# Supplementary material for: Insights into the Synergistic Effect of Fungi and Bacteria for Reactive Red Decolorization
Source: Hindawi journal article supplement (doi:10.1155/2014/237346), 2014-01-01
Supplement: f1 [file 237346.f1.pdf]

## Supplementary Materials

**Journal name:** Journal of Spectroscopy

**Article title:** Insights into the synergistic effect of fungi and bacteria for reactive red decolorization

**Author names:** Dandan Zhou, Xueying Zhang, Jun Wang, Lie Yan, Yilin Du, and Shuangshi Dong\*

**Affiliation:** Key Lab of Groundwater Resources and Environment, Ministry of Education, Jilin University, Changchun 130021, China

**e-mail address:** [sdong@jlu.edu.cn](mailto:sdong@jlu.edu.cn)

### 2 sequences of the Fungous

>Seq1 [organism=Geotrichum candidum] [clone= AS F-1] 18s ribosomal RNA gene, partial cds

```
CTCTAGTATAGCATTATACAGTGAAACTGCGAATGGCTCATTAAATCAGTTATCGTTTATTTG
ATATTACATTACTACTTGGATAACCGTGGTAATTCTAGAGCTAATACATGCTAAAACGGCCG
GGTTCCGGCTGGTATTTATTAGATAAAAAACCAATGCCCTCGGGCTCTATGGTGAATCATA
ATAACTTGTCGAATCGCATGGCCTTGTGCCGGCGATGGTTCATTCAAATTTCTGCCCTATCAA
CTTTTCGATGGTAGGATAGAGGCCTACCATGGTTTTAACGGGTAACGGGGAATCAGGGTTTCG
ATTCCGGAGAGGGAGCCTGAGAAACGGCTACCACATCCAAGGAAGGCAGCAGGCGCGCAA
ATTACCCAATCCTGACACAGGGAGGTAGTGACAATAAATAACGATACGGGGCCTATTAGGT
CTCGTAATTGGAATGAGAACAATTTAAATACCTTAACGAGGAACAATTAGAGGGCAAGTCT
GGTGCCAGCAGCCGCGGTAATTCCAGCTCTGATAGTATATATTAAGTTGTTGCAGTTAAAA
AGCTCGTAGTTGAAACTTGGGTGCGTAGGGGCGGTCTCTTTTAGAGTACTACCCTGAAACA
```

TCTTTCTTTGGTGTAAACTTTCTATTTATTTAGGAAGTGTAAACCAAACATTTACTTTGAAAA  
AATTAGAGTGTTCAAAGCAGGCCTTTGCTCGAATATATTAGCATGGAATAATAGAATAGGA  
CGTATGGTTCTATTTTGTGGTTTCTAGGACCGTCGTAATGATTAATAGGGACGGTCGGGGG  
CATCAGTATTCAGTTGTCAGAGGTGAAATTCTTGATTTACTGAAGACTAACTACTGCGAAA  
GCATTTGCCAAGGACGTTTTTCATTAATCAAGAACGAAAGTTAGGGGATCGAAGACGATCAG  
ATACCGTCGTAGTCTTAACCGTAACTATGCCGACTAGGGATCGGAGGGCGTTATAATAAC  
CTCTCCGGCACCTTACGAGAAATCAAAGTTTTTGGGTTCTGGGGGAGTATGGTTGCAAGG  
CTGAACTTAAAGGAATTGACGGAAGGGCACCACCAGGAGTGGAGCCTGCGGCTTAATTT  
GACTCAACACGGGGAAACTCACCAGGTCCAGACACAATAAGGATTGACAGATTGAGAGCTC  
TTTCATGATTTTGTGGGTGGTGGTGCATGGCCGTTCTTAGTTGGTGGAGTGATTTGTCTGCT  
TAATTGCGATAACGAACGAGACCTTAACCTGCTAAATAGCTGTAACAATAGATTATTGTTTT  
GACAGCTTCTTAGAGGGACTATCGATACA

>Seq2 [organism=Candida pseudolambica] [clone= AS F-2] 18s ribosomal RNA gene,  
partial cds

TTATAAGCATTATACGGTGAAGTGCGAATGGCTCATTAAATCAGTTATCGTTTATTTGATAGT  
TCCGTTCTACATGGATAACCGTGGAAAATCTAGAGCTAATACATGCGTAAAGCCCCGACTTT  
TGGAGGGGTGTATTTATTAGATAAAAAATCAATGCCCTCGGGCCTTTTGATGATTCATAATA  
ACTTTTCGAAGCTCATGGCCTTGTGCCGGAGCTGGTTCATTCAAATTTCTGCCCTATCAACTT  
TCGATGGTAGGATAGAGGCCTACCATGGTTTTTACGGGTAACGGGGAATAAGGGTTCGATT  
CCGGAGAGGGAGCCTGAGAAACGGCTACCACATCCAAGGAAGGCAGCAGGCGCGCAAATT  
ACCCAATCCTGACACAGGGAGGTAGTGACAATATATAACGATACAGGGCCTTTGGTCTTGT  
AATTGGAATGAGTACAATGTAATACCTAACGAGGAACAATTGGAGGGCAAGTCTGGTGC  
CAGCACCCGCGTAATTCCACCTCCAATAGCGTATATTAAGTTGTTGCAGTTAAAAAGCTC  
GTAGTTGAACTTTGGGCCTGGGCGGGCGGTCTACCTATGGTGGTACTGCTGCGGCCGGGT  
CTTTCTTCTGGCTAGCCCTTGTGGCGAACAGGACGATTACTTTGAGGAAATTAGAGTGTT  
CAAAGCAGGCCTTTGCTCGGATATATTAGCATGGAATAATAGAATAGGACGTATGGTTCTAT  
TTTGTTGGTTTCTAGGACCATCGTAATGATTAATAGGGACGGTGGGGGCATCAGTATTCA  
GTTGTCAGAGGTGAAATTCTTGATTAAGTGAAGACTAACTACTGCGAAAGCATTGCCAA  
GGACGTTTTTCATTAATCAAGAACGAAAGTTAGGGGATCGAAGATGATCAGATACCGTCGTA  
GTCTTAACCATAAACTATGCCGACTAGGGATCGGGTGGCGCTACTTTGCCACTCGGCACCT  
TACGAGAAATCAAAGTTTTTGGGTTCTGGGGGAGTATGGTTGCAAGGCTGAACTTAAAG  
GAATTGACGGAAGGGCACCACCAGGAGTGGAGCCTGCGGCTTAATTTGACTCAACACGGG  
GAAACTCACCAGGTCCAGACGTAATAAGGATTGACAAGTTAGAGACTTCTTTGATCTTACG  
GGTGGTGGTGCATGGCCGTTTTTAGTCCTTGGAGTGATTTGTCTGCTTAATTGCGATAACGG  
ACGAGACCTTAACCTGCTAAATAGGGCTGCGAGCATCTGCTCGTGGGCTCTTCTTAGAGGG  
ACTATGGGTATCAAA

## 15 sequences of the bacteria

>Seq1 [organism= Comamonadaceae bacterium] [clone= band 1] 16S rDNA gene, partial cds

```
ATTTACGCGGCTGCTGGCACGGAGTTAGCCGGGGCTTATTCTTACGGTACCGTCATGAGCCTTCTTT  
ATTAGAAAAGACCTTTTCGTTCCGTACAAAAGCAGTTTACAACCCGAAGGCCTTCATCCTGCACGCGG  
CATGGCTGGATCAGGCTTTCGCCATTGTCCAAAATCCCCACTGCTGCCTCCCGTGGG
```

>Seq2 [organism= delta proteobacterium] [clone= band 2] 16S rDNA gene, partial cds

```
CCTACGGGAGGCAGCAGTGGGGAATATTGGACAATGGGGGCGACCCTGATCCAGCCATGCCGCGT  
GAGTGATGAAGGCCTTCGGGTTGTAAAGCTCTGTCGGGAGGGAAGACGGGAGAAATCCCAGACGG  
TACCTCGCAAGAAAGCACCGGCTAACTCCGTGCCAGCAGCCGCGGTAAT
```

>Seq3 [organism= Phenyllobacterium sp.] [clone= band 3] 16S rDNA gene, partial cds

```
CCTACGGGAGGCAGCAGTAGGGAATCTTGCGCAATGGGCGAAAGCCTGACGCAGCCATGCCGCGT  
GAACGATGAAGGTCTTAGGATTGTAAAATCTTTCACCGGGGACGATAATGACGGTACCCGGAGAA  
GAAGCCCCGGCTAACTTCGTGCCAGCAGCCGCGGTAAT
```

>Seq4 [organism= Saprospiraceae bacterium] [clone= band 4] 16S rDNA gene, partial cds

```
ATTACGCGGCTGCTGGTACGGAGTTAGCCGGTGCTTATTCGTAAGGTACCGTCAACAGCACATAAA  
TGCCTGATTTCTTCCAAACAAAAGAAGTTTACAACCCATAGGGCCTTAATCCTTCACGCGGGATGG  
CTGAGTCAGATTTGCCTCCATTGCCAATATTCCTTACTGCTGCCTCCCGTAGG
```

>Seq5 [organism= Formosa sp.] [clone= band 5] 16S rDNA gene, partial cds

CCTACGGGAGGCAGCAGTAAGGAATATTGGACAATGGAGGCAACTCTGATCCAGCCATGCCGCGTG  
AAGGATTAAGGCCCTATAGGTTGTAACTTCTTTTAGACGGGACAAAACCCCTTTACGTGTAAAGGG  
TTGATGGTACTGTCAGAATAAGCATCGGCTAACTTCGTGCCAGCAGCCGCGGTAAT

>Seq6 [organism= Acidovorax sp.] [clone= band 6] 16S rDNA gene, partial cds

CCTACGGGAGGCAGCAGTGGGGAATTTTGGACAATGGGCGAAAAGCCTGATCCAGCCATGCCGCGTG  
CAGGATGAAGGCCTTCGGGTTGTAACTGCTTTTGTACGGAACGAAAAGACTCCTTCTAATAAAGGG  
GGTCCATGACGGTGCCGTAAGAATAAGCACCGGCTAACTACGTGCCAGCAGCCGCGGTAAA

>Seq7 [organism= Dyella sp.] [clone= band 7] 16S rDNA gene, partial cds

ATTACCGCGGCTGCTGGCACGAAGTTAGCCAGTGCTTATTCCTCAGGTACCGTCAGCACGTCAGAGT  
ATTAATCCAACGCTTTTCGTTCTGATAAAAGTGCTTTACAACCCGAAGGCCTTCTTCACACACGCGG  
CATTGCTGGATCAGGCTTGCGCCATTGTCCAATATCCCCACTGCTGCCTCCCGTAGG

>Seq8 [organism= beta proteobacterium] [clone= band 8] 16S rDNA gene, partial cds

CTACGGGAGGCAGCAGTGGGGAATTTTGGACAATGGGCGCAAGCCTGATCCAGCAATGCCGCGTGC  
AGGATGAAGGCCTTCGGGTTGTAACTGCTTTTGTACGGAACGAAACGGTCCTTTCTATTACGAGGG  
GCTAATGACGGTACCGTAAGAATAAGCACCGGCTAACTACGTGCCAGCAGCCGCGGTAAT

>Seq9 [organism= Candidatus Nitrotoga arctica] [clone= band 9] 16S rDNA gene, partial cds

CCTACGGGAGGCAGCAGTGGGGAATTTTGGACAATGGGCGCAAGCCTGATCCAGCCATGCCGCGTG  
AGTGAAGAAGGCCTTCGGGTTGTAAAGCTCTTTCAGGTGGAAAGAAAACGCATAGGTTAATACCTTG  
TGCGGATGACGGTACCATCAGAAGAAGCACCGGCTAACTACGTGCCAGCAGCCGCGGTAAT

>Seq10 [organism= Ideonella sp.] [clone= band 10] 16S rDNA gene, partial cds

ATTACCGCGGCTGCTGGCACGTAGTTAGCCGGTGCTTATTCTTCAGGTACCGTCATCACCCAAGATA  
TTAGCTTGAAGCTTTTCTTCCCTGACAAAAGCGGTTTACAACCCGAAGGCCTTCTCCCGCACGCGGC  
ATGGCTGGATCAGGCTTGCGCCATTGTCCAAAATCCCCACTGCTGCCTCCCGTAGG

>Seq11 [organism= Lewinella cohaerens] [clone= band 11] 16S rDNA gene, partial cds

CCTACGGGAGGCAGCAGTAAGGAATATTGGACAATGGCCGCAAGGCTGATCCAGCCATCCAGCGTG  
CAGGAAGAAGGCCCTATGGGTTGTAACTGCTTTTATCAGGGAATAAACCTCTGGATTCACTCCGGA  
GCTGAAGGTACCTGAAGAATAAGCACCGGCTAACTCCGTGCCAGCAGCCGCGGTAAT

>Seq12 [organism= Acidovorax sp.] [clone= band 12] 16S rDNA gene, partial cds

ATTACGCGGCTGCTGGCACGTAGTTAGCCGGTGCTTATTCTTACGGTACCGTCATGAGCCCCAGGTA  
TTAACCGGAGCCTTTTCGTTCCGTACAAAAGCAGTTTACAACCCGAAGGCCTTCATCCTGCACGCGGA  
ATGGCTGGATCAGGCTTGCGCCATTGTCCAAAATCCCCACTGCTGCCTCCCGTAGG

>Seq13 [organism= Porphyromonadaceae bacterium] [clone= band 13] 16S rDNA gene,  
partial cds

ATTACCGCGGCTGCTGGCACGGAGTTAGCCGATCCTTATTCTCAGGGTACATACAAAACAGGACACG  
TCCTGCACTTATTCCCCTGCAAAGAAGTTTACGAACCATAGATCCTTCTTCTCAGCGACTTGCC  
TGGTTCAGGCTCTCGCCATTGACCAATATTCCTCACTGCTGCCTCCCGTAGG

>Seq14 [organism= Candidatus Nitrospira defluvii] [clone= band 14] 16S rDNA gene, partial  
cds

GGCTGCTTCTGGAGGTACCGTCCGAACGATTGCTCGCTCCATCTTCCCTCCC  
GAAAGGGGTTTACAAT  
CCGAAGACCTTCATCCCCACGCGGCGTCGCTGCGTCAGGCTTTCGCCATTGCGCAATATCCCCAC  
TGCTGCCTCCCGTAGG

>Seq15 [organism= *Phycisphaera mikurensis*] [clone= band 15] 16S rDNA gene, partial cds

CCTACGGGAGGCAGCAGTGGGGAATATCCACAATGCGCGCAAGCGTGATGGAGCAATGCCGCGT  
GCAGGATGAAGCCCTTCGGGGTGTAAGTCTGCTGTCAGGGGTAGCCAACTCAATGAGGCGCCCCAAA  
GGAAGAGACGACTAACTCTGTGCCAGCAGCCGCGTAAT
